# Supplementary material for: Improving Air Quality Standards in Europe: Comparative Analysis of Regional Differences, with a Focus on Northern Italy
Source: MDPI journal article supplement (doi:10.3390/atmos13050642), 2022-04-19
Supplement: s1 [file s1]

Supplementary Materials

# Improving Air Quality Standards in Europe: Comparative Analysis of Regional Differences, with a Focus on Northern Italy

Angelo Robotto <sup>1</sup>, Secondo Barbero <sup>1</sup>, Pierangiola Bracco <sup>2</sup>, Roberto Cremonini <sup>1</sup>, Marco Ravina <sup>3</sup>  
and Enrico Brizio <sup>1,\*</sup>

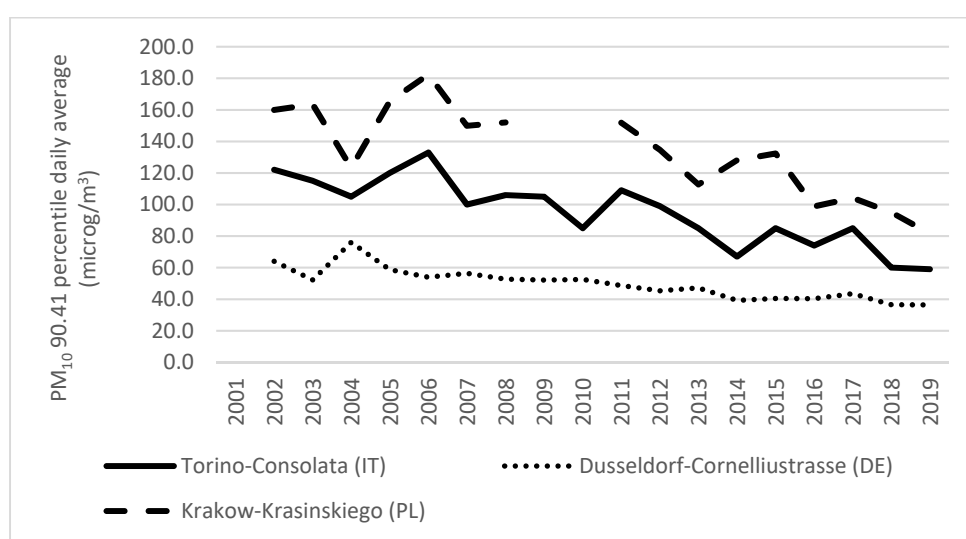

**Figure S1.** Air quality trends for PM<sub>10</sub> (90.41 percentile daily average) measured at 3 urban-traffic stations in Torino (IT), Düsseldorf (DE) and Krakow (PL).

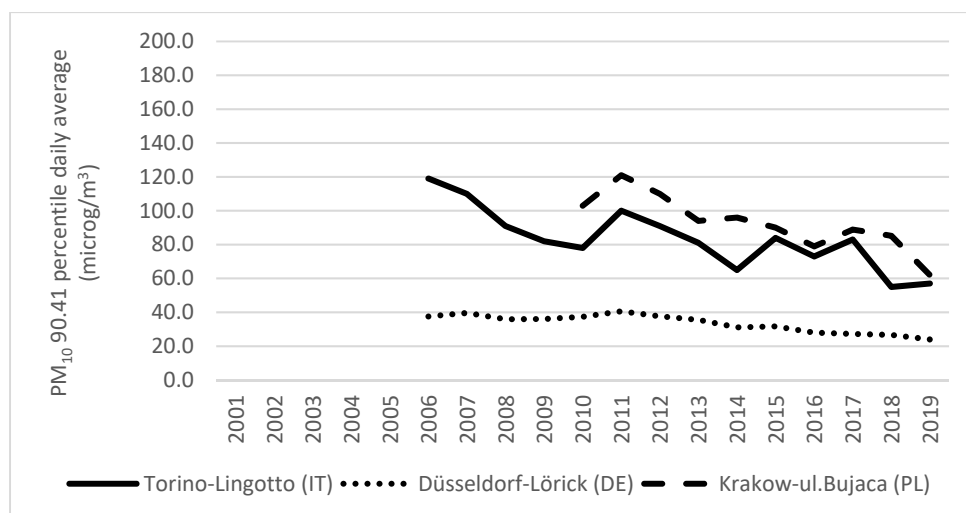

**Figure S2.** Air quality trends for PM<sub>10</sub> (90.41 percentile daily average) measured at 3 urban-back-ground stations in Torino (IT), Düsseldorf (DE) and Krakow (PL).

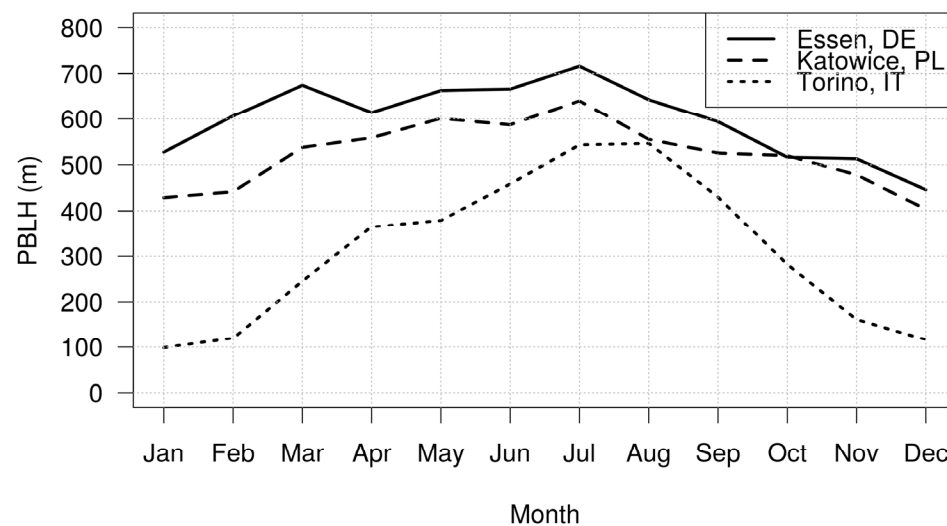

**Figure S3.** PBL height (monthly average) in Torino (IT), Essen (DE) and Katowice (PL), average values from 1979 to 2020.

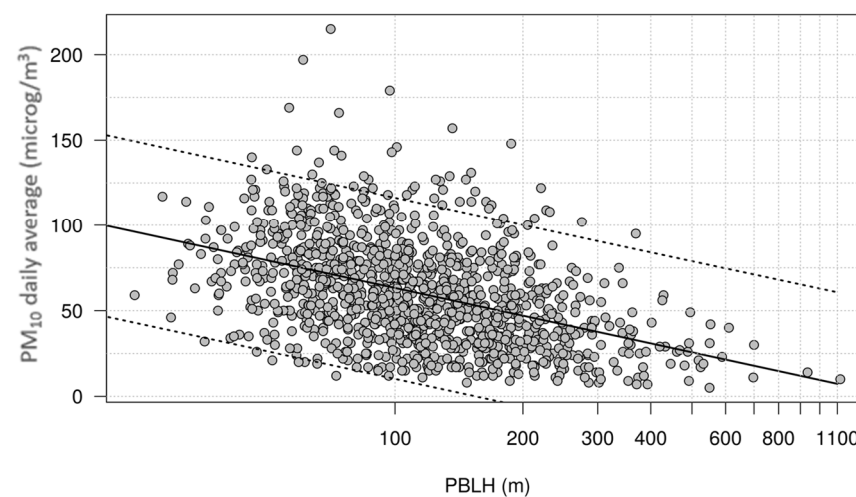

**Figure S4.** Correlation between PBL height and PM<sub>10</sub> daily averages measured in Torino (N-W Italy) in the period from 2011 to 2020.

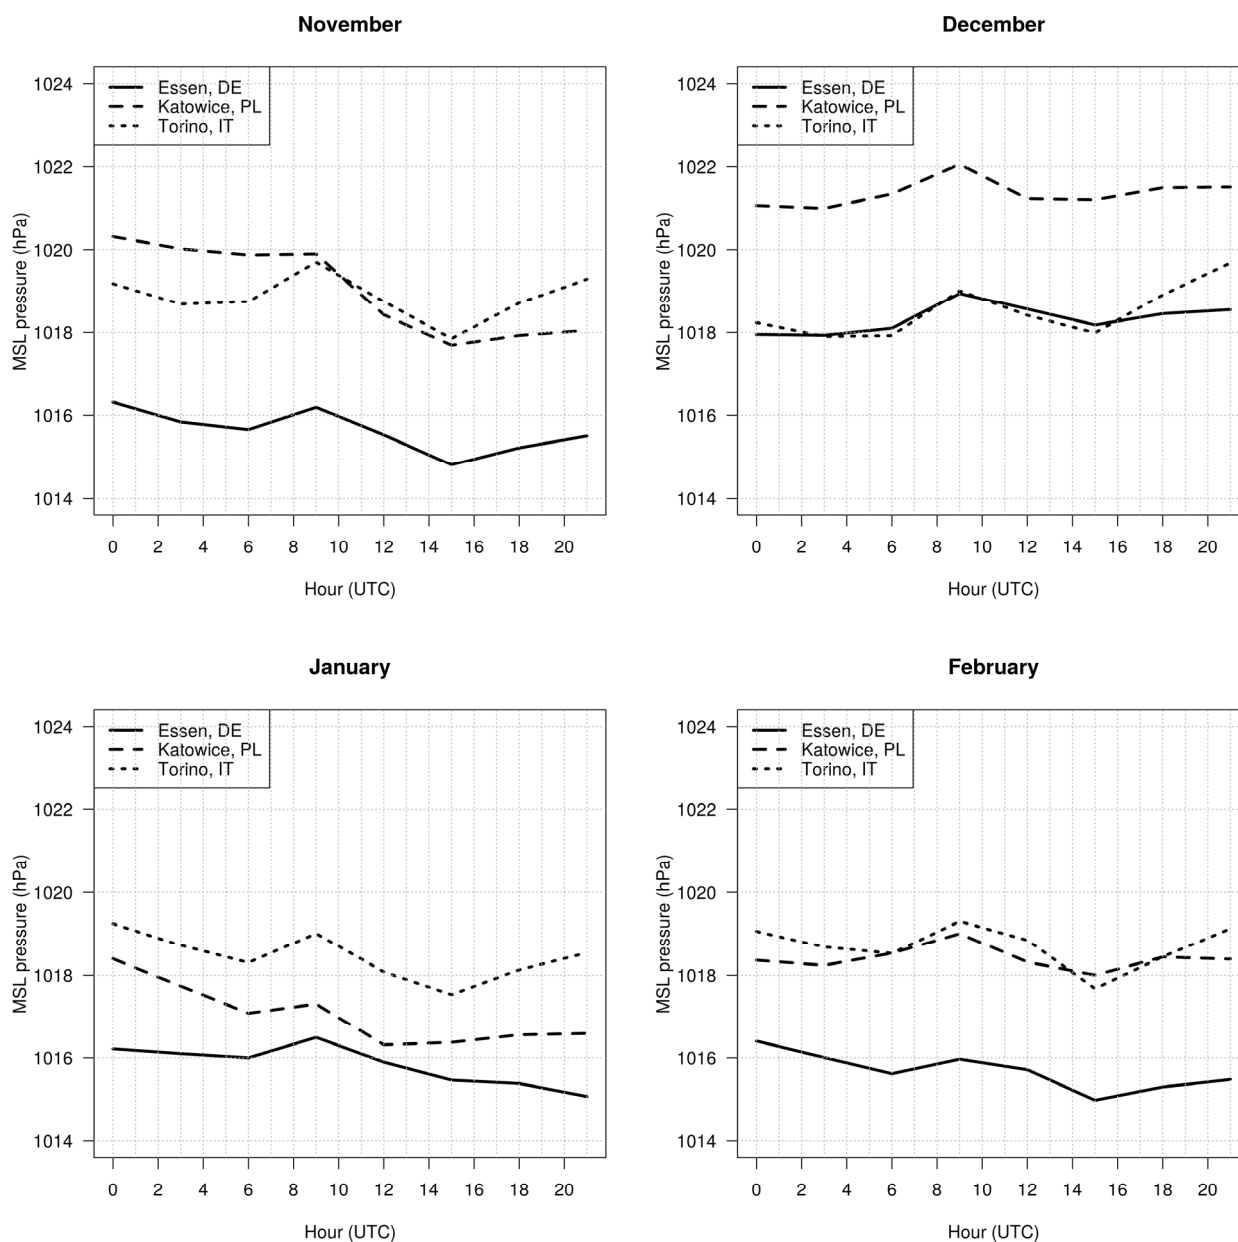

**Figure S5.** Mean sea level pressure diurnal pattern in Torino (North Western Italy), Essen (North Western Germany) and Katowice (Southern Poland) during the cold season (average values from 1979 to 2020).

**Table S1.** Emission reduction of the main air pollutants by Member State from 2005 to 2019.

|             | NH <sub>3</sub> | NM VOC | NO <sub>x</sub> | PM <sub>2.5</sub> | SO <sub>x</sub> | Average Reduction 2005-2019 |
|-------------|-----------------|--------|-----------------|-------------------|-----------------|-----------------------------|
| Germany     | 3%              | 25%    | 31%             | 33%               | 45%             | 27%                         |
| France      | 5%              | 40%    | 48%             | 51%               | 78%             | 44%                         |
| Italy       | 15%             | 33%    | 51%             | 20%               | 74%             | 39%                         |
| Spain       | 2%              | 23%    | 52%             | 8%                | 88%             | 35%                         |
| Poland      | 6%              | 16%    | 23%             | 21%               | 62%             | 26%                         |
| Romania     | 17%             | 29%    | 34%             | 7%                | 84%             | 34%                         |
| Netherlands | 19%             | 11%    | 43%             | 46%               | 66%             | 37%                         |

**Table S2.** Emissions of main atmospheric pollutants in the Po Basin (Piedmont+Lombardy+Emilia Romagna+Veneto) and other European regions.

| EU State | Region/State           | Population | Surface (km <sup>2</sup> ) | CO <sub>2eq</sub> (kt/y) | NH <sub>3</sub> (t/y) | NO <sub>x</sub> (t/y) | PM <sub>10</sub> (t/y) | PM <sub>2.5</sub> (t/y) | SO <sub>2</sub> (t/y) | Ref. Year |
|----------|------------------------|------------|----------------------------|--------------------------|-----------------------|-----------------------|------------------------|-------------------------|-----------------------|-----------|
| IT (NW)  | Piedmont               | 4,273,210  | 25,402                     | 40,547.9                 | 40,007.6              | 72,945.8              | 16,911.9               | 12,680.1                | 8,374.8               | 2015      |
| IT (NW)  | Lombardy               | 9,964,993  | 23,844                     | 76,970.1                 | 97,114.0              | 111,474.6             | 17,822.9               | 15,040.1                | 11,179.8              | 2017      |
| IT (NE)  | Emilia Romagna         | 4,448,545  | 22,446                     | 34,605.4                 | 48,438.1              | 81,173.2              | 10,958.4               | 9,532.4                 | 11,435.3              | 2017      |
| IT (NE)  | Veneto                 | 4,841,175  | 18,345                     | 33,794.0                 | 51,854.6              | 61,450.7              | 13,904.5               | 12,703.9                | 5,003.3               | 2017      |
| DE (NW)  | North Rhine-Westphalia | 17,925,570 | 34,084                     | 276,099.3                | 91,402.9              | 265,536.9             | 18,952.3               | /                       | 83,277.7              | 2016      |
| DE (SE)  | Bavaria                | 13,124,737 | 70,550                     | 110,053.7                | 86,048.0              | 168,763.0             | 16,172.0               | /                       | 25,740.0              | 2010      |
| DE (SW)  | Baden-Württemberg      | 11,100,394 | 35,751                     | 83,266.9                 | 54,404.8              | 112,147.3             | 13,331.0               | /                       | 12,801.6              | 2018      |
| PL (S)   | Lesser Poland          | 3,404,863  | 15,183                     | 25,105.7                 | /                     | 53,247.3              | 32,633.2               | 28,231.9                | 42,694.6              | 2018      |
| PL (S)   | Silesian               | 4,524,091  | 12,333                     | 59,730.8                 | /                     | 83,842.3              | 36,283.5               | 31,070.2                | 36,897.7              | 2018      |
